# Supplementary material for: Structure of the Head of the Bartonella Adhesin BadA
Source: PubMed Central journal article supplement (PMC2483945; doi:10.1371/journal.ppat.1000119), 2008-08-08

**BadA head fragment sequence**

MKALRGMISEKGGWNLTVNNDNNTVVSSGGALDLSSGSKNLKIVKDGKKNVTFDVAR  
DLTLKSIKLDGVTLNETGLFIANGPQITASGINAGSQKITGVAEGTDANDA  
VNFGQLKKIETEVKEQVAASGFVKQDSDTKYL TIGKDTDGDTINIANNKSDKRT

**Trypsin fragments found:**

GMISEKGGWNLTVNNDNNTVVSSGGALDLSSGSKNLKIVKDGKKNVTFDVAR  
DLTLKSIKLDGVTLNETGLFIANGPQITASGINAGSQKITGVAEGTDANDA  
VNFGQLKKIETEVKEQVAASGFVKQDSDTK

13941 Da

GMISEKGGWNLTVNNDNNTVVSSGGALDLSSGSKNLKIVKDGKKNVTFDVAR  
DLTLKSIKLDGVTLNETGLFIANGPQITASGINAGSQKITGVAEGTDANDA  
VNFGQLKKIETEVKEQVAASGFVK

13266 Da

**Chymotrypsin fragments found:**

RGMISEKGGWNLTVNNDNNTVVSSGGALDLSSGSKNLKIVKDGKKNVTFDVAR  
DLTLKSIKLDGVTLNETGLFIANGPQITASGINAGSQKITGVAEGTD  
ANDAVNFGQLKKIETEVKEQVAASGFVKQDSDTKYL

14374 Da

RGMISEKGGWNLTVNNDNNTVVSSGGALDLSSGSKNLKIVKDGKKNVTFDVAR  
DLTLKSIKLDGVTLNETGLFIANGPQITASGINAGSQKITGVAEGTD  
ANDAVNFGQLKKIETEVKEQVAASGFVKQDSDTKY

14261 Da

RGMISEKGGWNLTVNNDNNTVVSSGGALDLSSGSKNLKIVKDGKKNVTFDVAR  
DLTLKSIKLDGVTLNETGLFIANGPQITASGINAGSQKITGVAEGTD  
ANDAVNFGQLKKIETEVKEQVAASGF

13195 Da

**Analysis Info**    **Trypsin digest, 8.9-9.1 min**  
Analysis Name    D:\Data\12\_2006\MT0949\_Albrecht\_BADA6-T\_3\_01\_1531.d  
Method            lc600-3000.m  
Sample Name      MT0949\_Albrecht\_BADA6-T  
Comment

Acquisition Date    12/13/2006 6:27:58 PM  
Operator             Administrator  
Instrument            micrOTOF

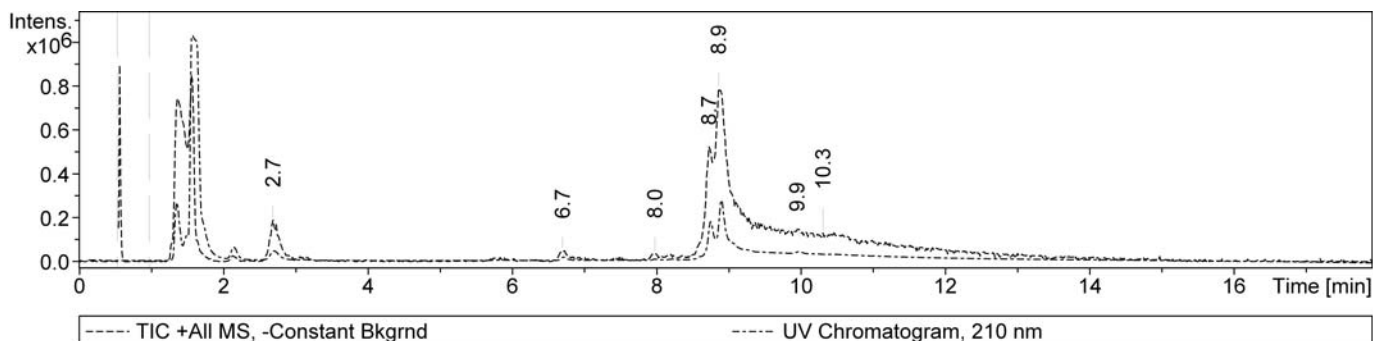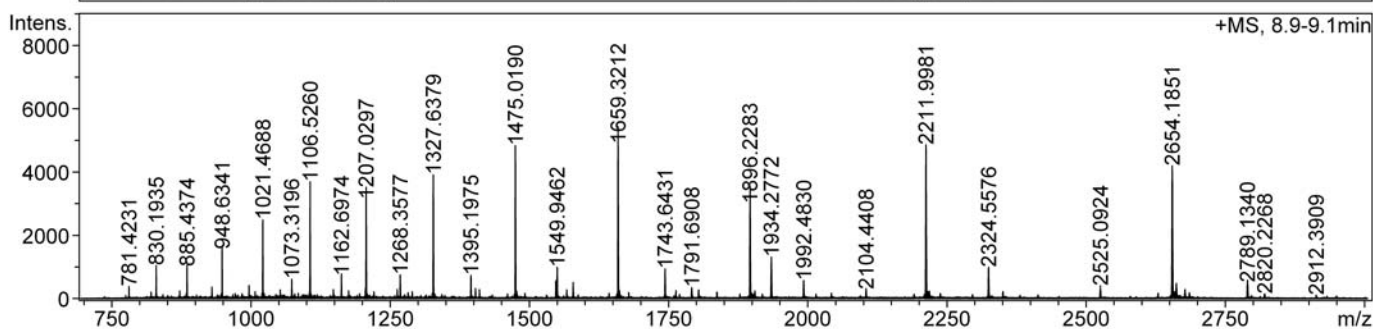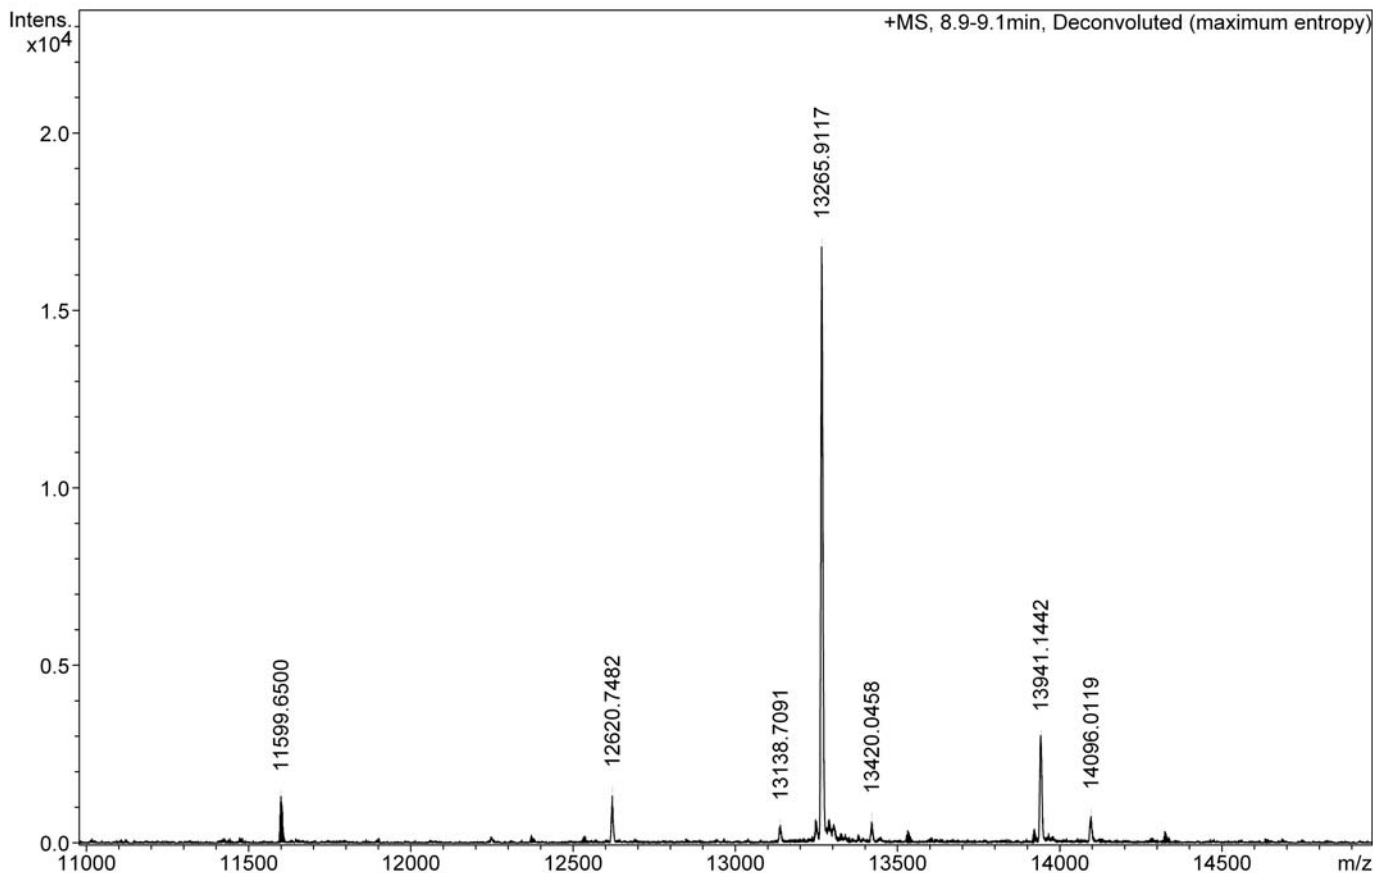

Supplement: ppat.1000119.s001.pdf [file ppat.1000119.s001.pdf]
